# Supplementary material for: Sheet-Like Morphology CuO/Co3O4 Nanocomposites for Enhanced Catalysis in Hydrogenation of CO2 to Methanol
Source: MDPI journal article supplement (doi:10.3390/nano13243153), 2023-12-16
Supplement: s1 [file s1]

# Sheet-like Morphology CuO/Co<sub>3</sub>O<sub>4</sub> Nanocomposites for Enhanced Catalysis in Hydrogenation of CO<sub>2</sub> to Methanol

Zhenteng Sheng, Hui Zhou, Yuhua Zhang, Jinlin Li \* and Li Wang \*

Key Laboratory of Catalysis and Energy Materials Chemistry of Ministry of Education , Hubei Key Laboratory of Catalysis and Materials Science, South-Central Minzu University, Wuhan 430074, China

\* Correspondence: lij@mail.scuec.edu.cn (J.L.); li.wang@scuec.edu.cn (L.W.)

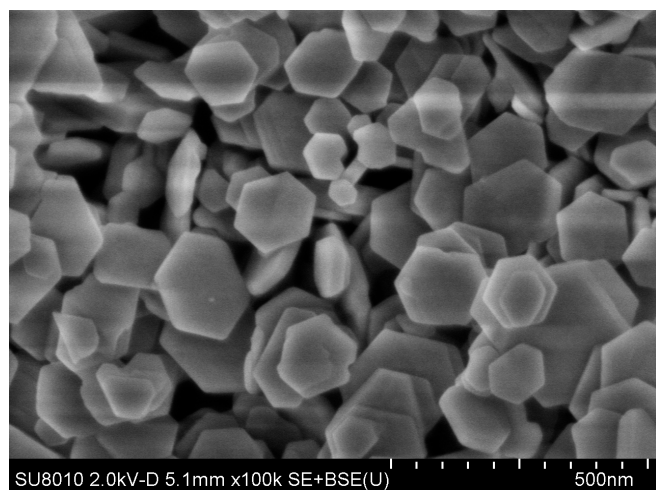

**Figure S1.** SEM image of  $\text{Co(OH)}_2$ .

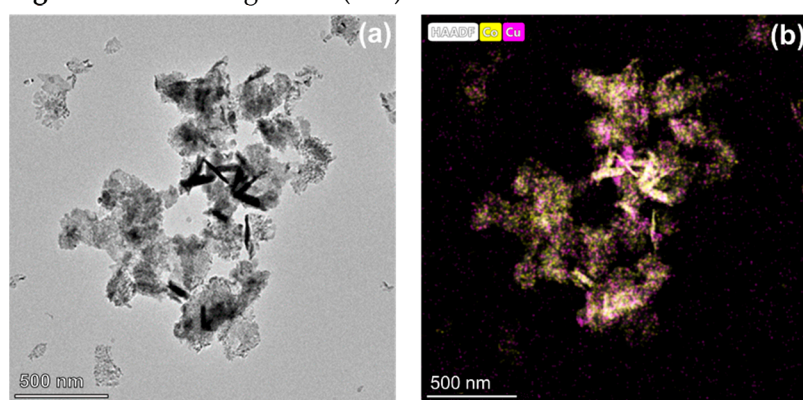

**Figure S2.** (a) STEM image of  $\text{CuO/Co}_3\text{O}_4\text{-IM}$ ; (b) EDX elemental mappings of  $\text{CuO/Co}_3\text{O}_4\text{-IM}$  yellow represents Co, and purple represents Cu.

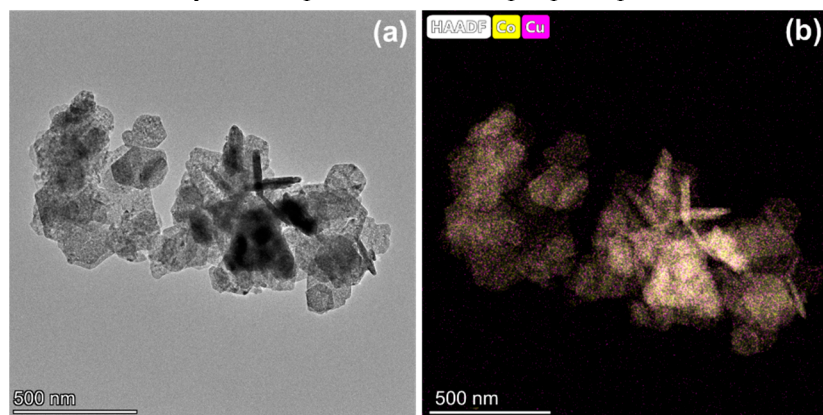

**Figure S3.** (a) STEM image of  $\text{CuO/Co}_3\text{O}_4\text{-IE}$ ; (b) EDX elemental mappings of  $\text{CuO/Co}_3\text{O}_4\text{-IE}$  yellow represents Co, and purple represents Cu.

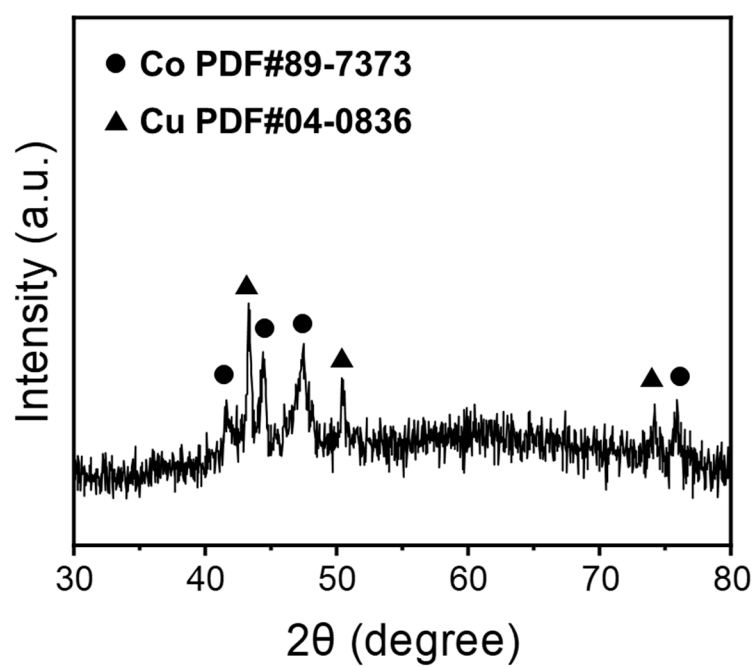

**Figure S4.** XRD patterns of CuO/Co<sub>3</sub>O<sub>4</sub>-IE spent catalyst.

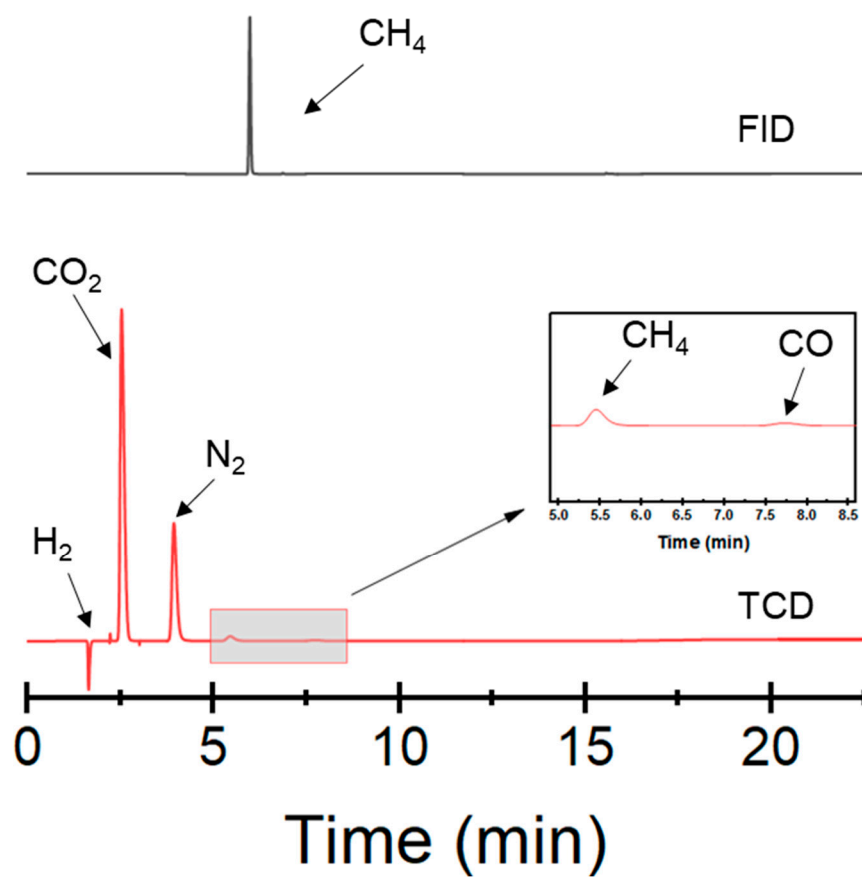

**Figure S5.** Agilent GC 7890B chromatogram of gas phase products of CO<sub>2</sub> Hydrogenation catalyzed by CuO/Co<sub>3</sub>O<sub>4</sub>-IE.

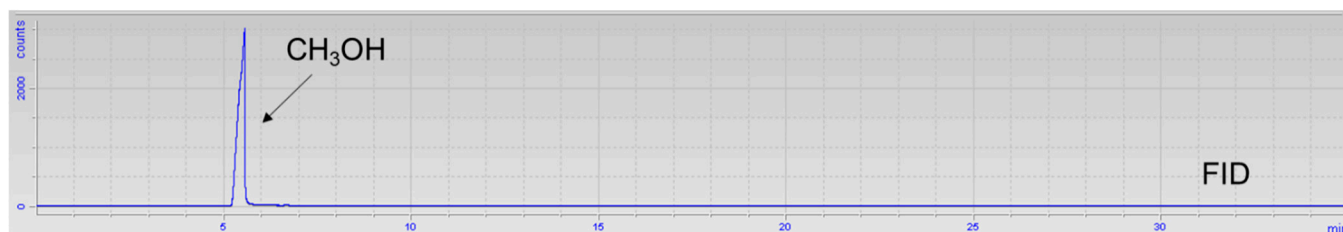

**Figure S6.** Agilent GC 4890D chromatogram of liquid phase products of CO<sub>2</sub> Hydrogenation catalyzed by CuO/Co<sub>3</sub>O<sub>4</sub>-IE.

**Table S1.** The results of XPS Co 2p<sub>3/2</sub> for CuO/Co<sub>3</sub>O<sub>4</sub>-IE, CuO/Co<sub>3</sub>O<sub>4</sub>-IM and Co<sub>3</sub>O<sub>4</sub> catalysts.

| Catalysts                                | Co 2p <sub>3/2</sub> Binding Energy (eV) |                  |
|------------------------------------------|------------------------------------------|------------------|
|                                          | Co <sup>3+</sup>                         | Co <sup>2+</sup> |
| Co <sub>3</sub> O <sub>4</sub>           | 779.9                                    | 781.5            |
| 1CuO/4Co <sub>3</sub> O <sub>4</sub> -IM | 779.5                                    | 780.9            |
| 1CuO/4Co <sub>3</sub> O <sub>4</sub> -IE | 779.4                                    | 780.8            |

**Table S2.** XPS O 1s fitting peak data of the different catalysts.

| Catalysts                                | O (%) | O <sub>c</sub> /O <sub>T</sub> <sup>a</sup> | O <sub>d</sub> /O <sub>T</sub> <sup>a</sup> | O <sub>i</sub> /O <sub>T</sub> <sup>a</sup> |
|------------------------------------------|-------|---------------------------------------------|---------------------------------------------|---------------------------------------------|
| Co <sub>3</sub> O <sub>4</sub>           | 71.1% | 8.9%                                        | 36.6%                                       | 54.5%                                       |
| 1CuO/4Co <sub>3</sub> O <sub>4</sub> -IM | 66.8% | 11.2%                                       | 29.5%                                       | 59.1%                                       |
| 1CuO/4Co <sub>3</sub> O <sub>4</sub> -IE | 65.3% | 5.6%                                        | 31.0%                                       | 63.4%                                       |

**Table S3.** The results of XPS O 1s for CuO/Co<sub>3</sub>O<sub>4</sub>-IE, CuO/Co<sub>3</sub>O<sub>4</sub>-IM and Co<sub>3</sub>O<sub>4</sub> catalysts.

| Catalysts                                | O 1s Binding Energy (eV) |                     |                          |
|------------------------------------------|--------------------------|---------------------|--------------------------|
|                                          | O <sub>lattice</sub>     | O <sub>defect</sub> | O <sub>chemisorbed</sub> |
| Co <sub>3</sub> O <sub>4</sub>           | 530.0                    | 531.3               | 533.1                    |
| 1CuO/4Co <sub>3</sub> O <sub>4</sub> -IM | 529.8                    | 531.5               | 533.2                    |
| 1CuO/4Co <sub>3</sub> O <sub>4</sub> -IE | 529.8                    | 531.8               | 533.6                    |

**Table S4.** X-ray photoelectron spectroscopy surface elemental concentrations (at.%) as well as the relative surface concentration of the elements.

| Catalysts                                | Co%  | Cu%  | O%   |
|------------------------------------------|------|------|------|
| Co <sub>3</sub> O <sub>4</sub>           | 70.5 | 0    | 29.5 |
| 1CuO/4Co <sub>3</sub> O <sub>4</sub> -IM | 65.3 | 11.7 | 23.0 |
| 1CuO/4Co <sub>3</sub> O <sub>4</sub> -IE | 65.0 | 6.3  | 28.7 |

**Table S5.** Chemisorption amounts of CO and H<sub>2</sub> over CuO/Co<sub>3</sub>O<sub>4</sub>-IE, CuO/Co<sub>3</sub>O<sub>4</sub>-IM and Co<sub>3</sub>O<sub>4</sub> catalysts.

| Catalysts                                | CO <sub>2</sub> -TPD                                                       | H <sub>2</sub> -TPD                                                       |
|------------------------------------------|----------------------------------------------------------------------------|---------------------------------------------------------------------------|
|                                          | CO <sub>2</sub> uptake ( $\mu\text{mmol}\cdot\text{g}_{\text{cat}}^{-1}$ ) | H <sub>2</sub> uptake ( $\mu\text{mmol}\cdot\text{g}_{\text{cat}}^{-1}$ ) |
| Co <sub>3</sub> O <sub>4</sub>           | 501.1                                                                      | 374.2                                                                     |
| 1CuO/4Co <sub>3</sub> O <sub>4</sub> -IM | 450.3                                                                      | 302.1                                                                     |
| 1CuO/4Co <sub>3</sub> O <sub>4</sub> -IE | 393.7                                                                      | 258.6                                                                     |

**Table S6.** State of art Co-Cu catalysts for methanol synthesis by CO<sub>2</sub> hydrogenation.

| Catalysts                                | T (°C) | p (MPa) | MeOH Selectivity(%) | MeOH STY                                                  |
|------------------------------------------|--------|---------|---------------------|-----------------------------------------------------------|
| 5Cu5CoZ <sup>[1]</sup>                   | 190    | 3       | 76.1                | 0.62 mmol·g <sub>cat</sub> <sup>-1</sup> ·h <sup>-1</sup> |
| 1CuO/4Co <sub>3</sub> O <sub>4</sub> -IE | 250    | 2       | 36.1                | 1.23 mmol·g <sub>cat</sub> <sup>-1</sup> ·h <sup>-1</sup> |

1. Din, I.U.; Alotaibi, M.A.; Alharthi, A.I.; Al-Shalwi, M.N.; Alshehri, F. Green Synthesis Approach for Preparing Zeolite Based Co-Cu Bimetallic Catalysts for Low Temperature CO<sub>2</sub> Hydrogenation to Methanol. *Fuel* **2022**, 330, 125643.
